# Supplementary material for: Reactions of persulfides with the heme cofactor of oxidized myoglobin and microperoxidase 11: reduction or coordination
Source: Royal Society of Chemistry journal article supplement (doi:10.1039/c7dt01638g), 2017-01-01
Supplement: c7dt01638g1.pdf [file c7dt01638g1.pdf]

## Reactions of persulfides with the heme cofactor of oxidized myoglobin and microperoxidase 11: reduction or coordination.

Erwan Galardon,<sup>\*a</sup> Florian Huguet,<sup>a</sup> Christian Herrero,<sup>b</sup> Rémy Ricoux,<sup>b</sup> Isabelle Artaud<sup>a</sup> and Dominique Padovani<sup>a</sup>

**Figure S1.** UV-Vis spectra (top) and X-band EPR spectra (bottom) recorded at 10 K of (TMP)FeOH<sup>I</sup> (2  $\mu$ M in toluene, field modulation amplitude of 0.1 mT, microwave power of 10 mW) before (red) and after (blue) addition of 5 equivalents of tBuSSH,<sup>2</sup> under anaerobic conditions.

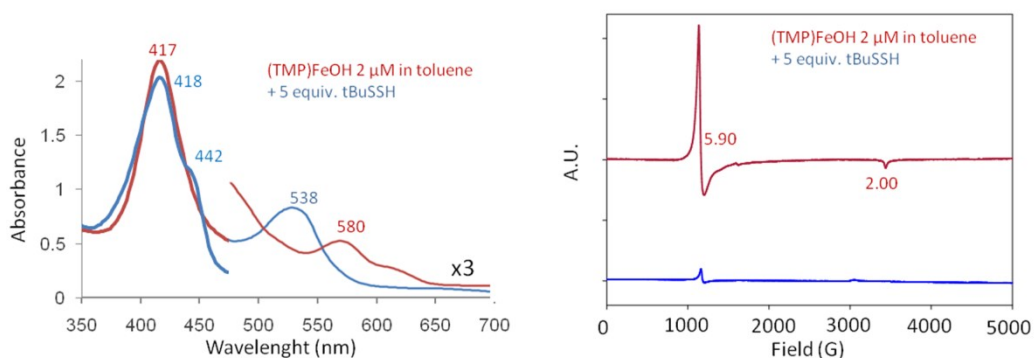

**Figure S2.** Variations of the current intensity recorded over time using the ISO-H2S-2 sensor upon the addition of P\* (100  $\mu$ M), then NAcMP11(III) (3  $\mu$ M) then Na<sub>2</sub>S (2  $\mu$ M) in HEPES buffer (50 mM, pH 7.4, DTPA 1mM) under anaerobic conditions.

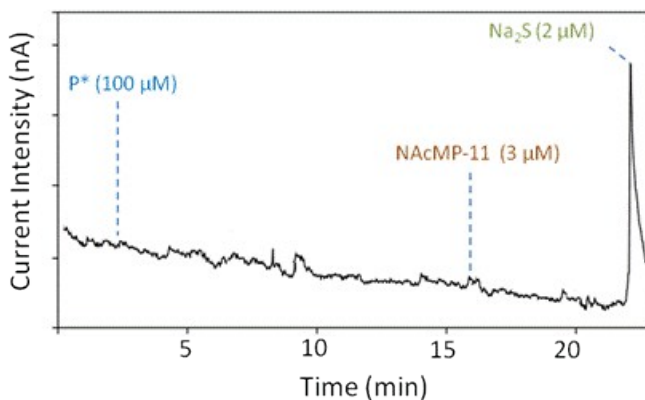

**Figure S3.** High Resolution mass spectrum of a mixture of NAcMP1(III) (20  $\mu$ M) and P\* (500  $\mu$ M) in 10 mM Tris buffer (pH = 7.4) recorded in ESI+ mode. The deviation from the theoretical mass was calculated with Xcalibur 2.2.

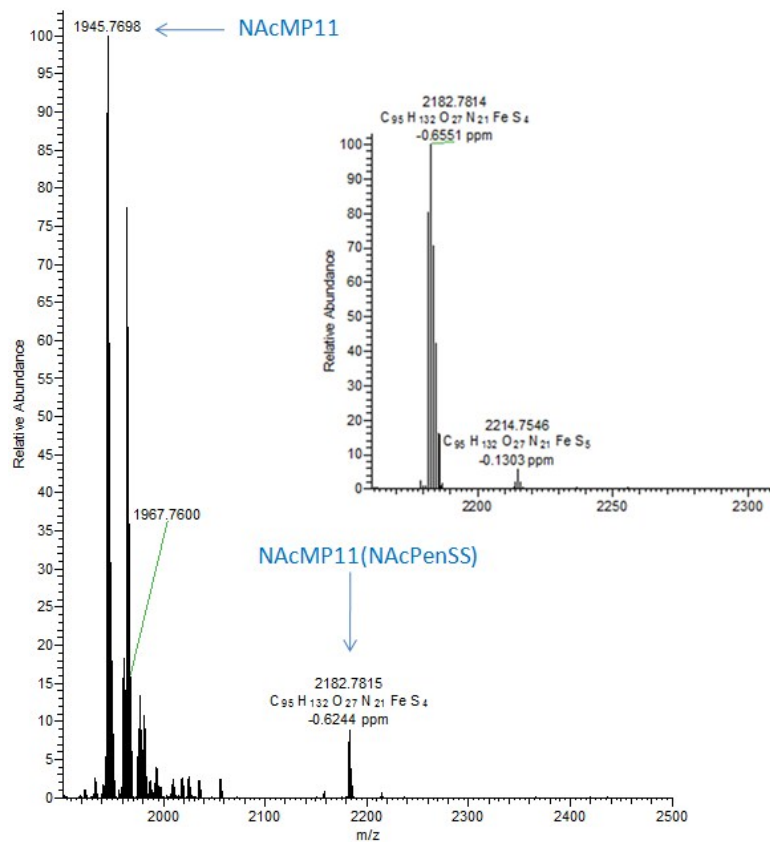

**Figure S4.** UV-Vis spectra recorded after the successive additions of 20  $\mu$ M dithionite (green), 100  $\mu$ M of P\* (blue) and 10 mM NMI (cyan) to a solution of NAcMP1(III) (2  $\mu$ M) (red) in HEPES buffer (50 mM, pH 7.4, DTPA 1mM) under anaerobic conditions.

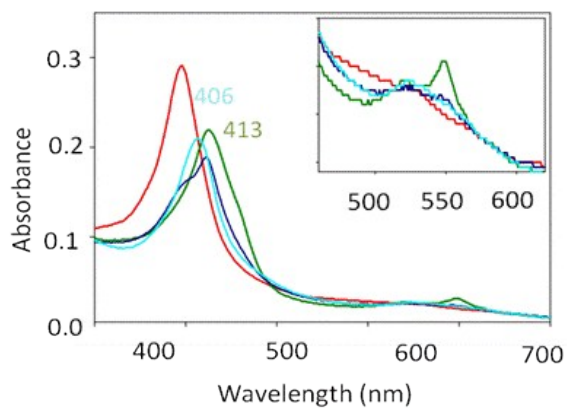

**Figure S5.** UV-vis spectra of metMb(III) (3.5  $\mu$ M) before (red) and after (green) reactivity for 15 min with GSSH generated from 2.5 mM GSH and 0.5 mM PhSO<sub>2</sub>SNa in HEPES buffer (50 mM, pH 7.4, DTPA 1mM) under aerobic conditions.

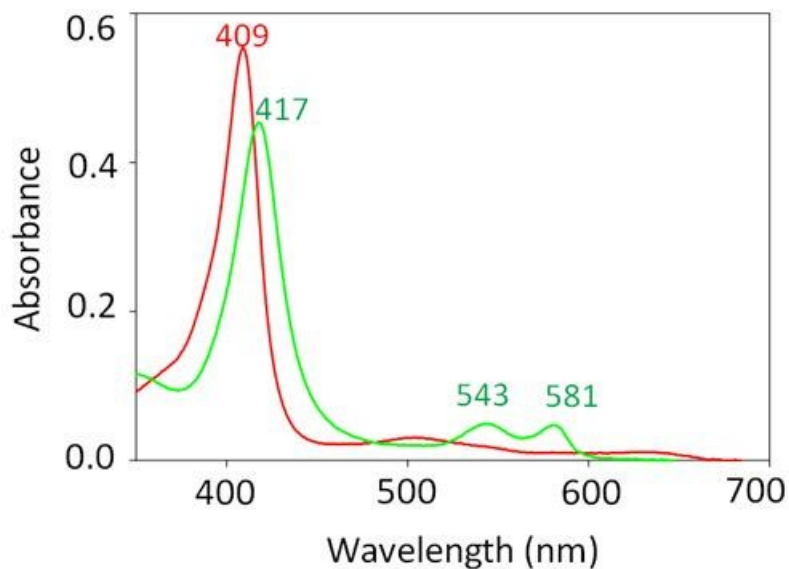

**Figure S6 .** Evolution of the UV-vis spectrum of the product initially formed by the reaction between metMb(III) (3.5  $\mu$ M) and P\* (100  $\mu$ M) (red trace), and 15 minutes after addition of D-glucose (20 mM), glucose oxidase (100 U) and catalase (1000U) in HEPES buffer (50 mM, pH 7.4, DTPA 1mM) (green trace).

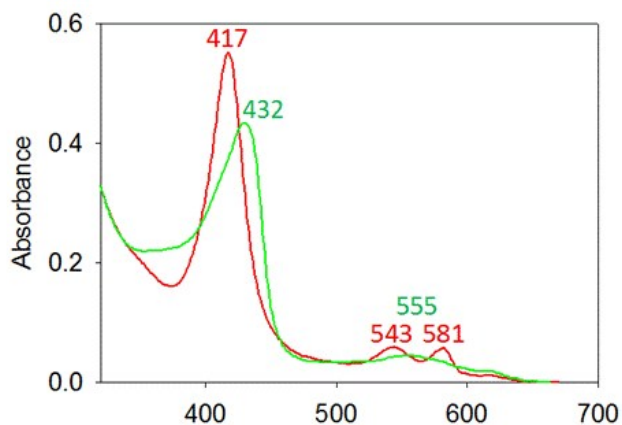

**Figure S7.** Representative experiments showing the variation of absorbance over time when metMb(III) (3.5  $\mu\text{M}$ ) is allowed to react with P\* (50  $\mu\text{M}$ ) under anaerobic (A, formation of deoxyMb(II) recorded at 433 nm) or aerobic (B, formation of oxyMb(II) recorded at 581 nm) conditions. The data were fitted with an exponential function ( $A(t) = y_0 + a \cdot (1 - \exp(-k \cdot t))$ ) and the resulting parameters are reported on the plots.

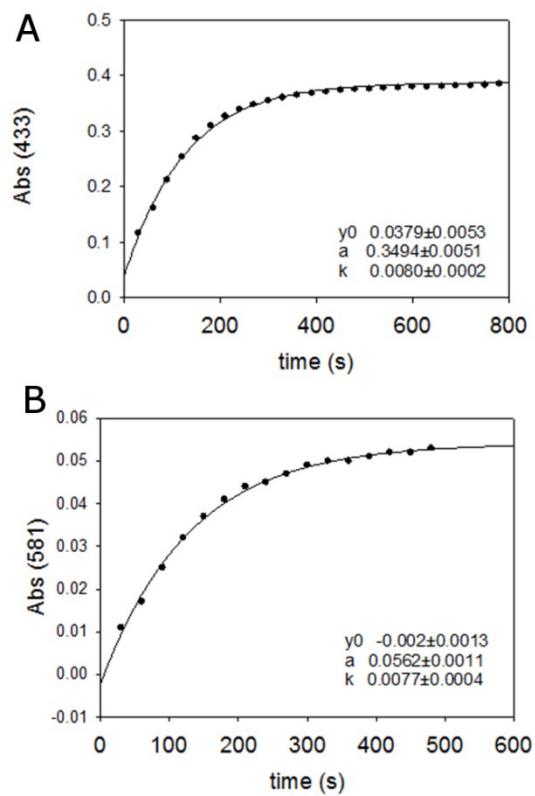

**Figure S8.** HPLC-MS spectra of the mixture obtained after the incubation of P\* (100  $\mu$ M) alone (left panel) or in the presence of 50  $\mu$ M FerrylMb(IV) (right panel) in Tris buffer (10 mM, pH 7.4) for 30 minutes.

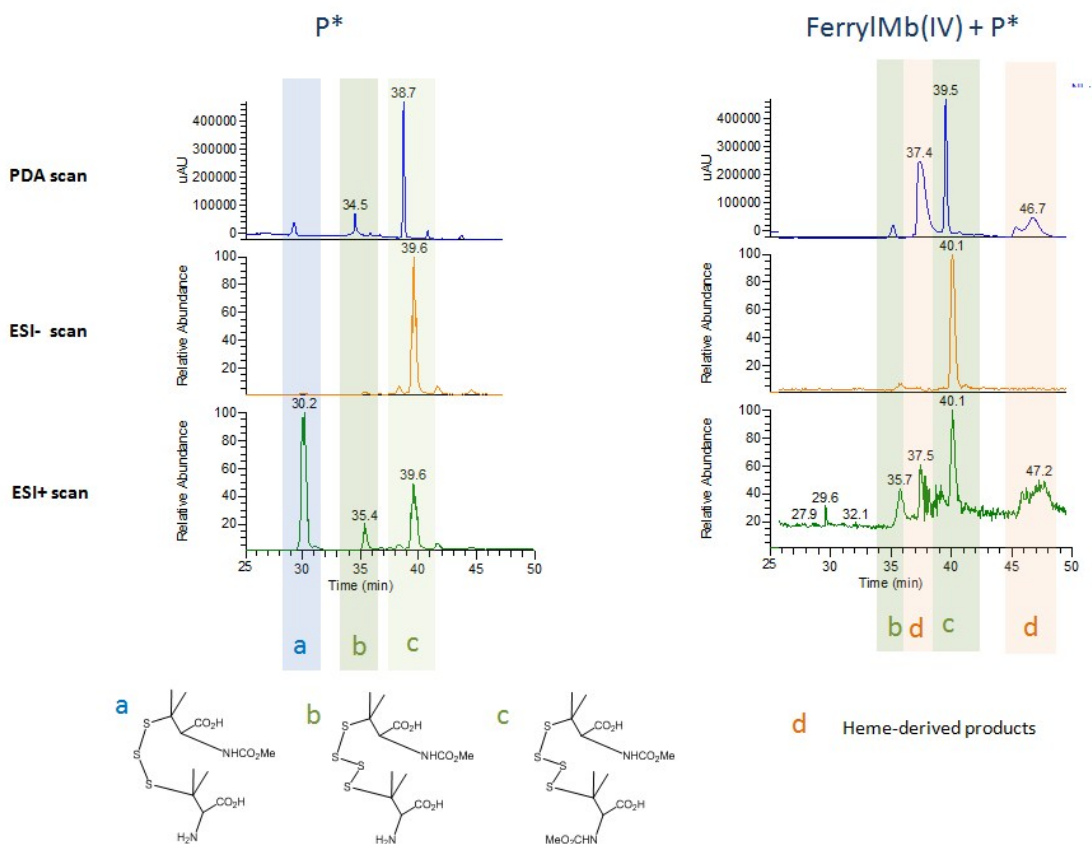

**Figure S9.** Zoom of the visible region (500-700 nm) of the UV-vis spectra obtained after the addition of 200  $\mu$ M of P\* to ferrylMb(IV) (2  $\mu$ M) in the presence (red trace) or absence (blue trace) of catalase.

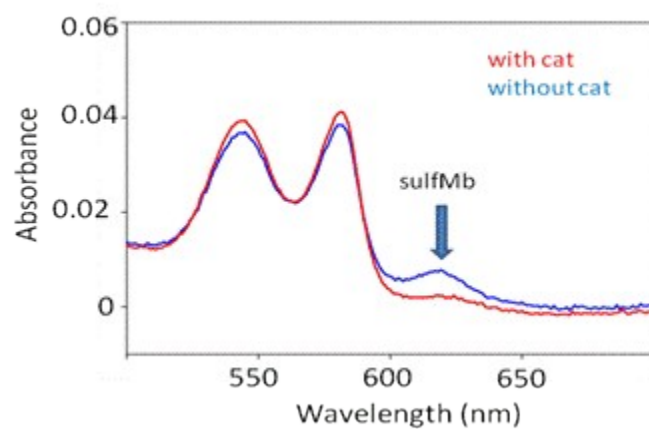

**Figure S10.** UV-Vis spectrum of the product obtained after mixing FerrylMb(IV) ( $2 \mu\text{M}$ ) with  $\text{Na}_2\text{S}$  ( $2 \mu\text{M}$ ) in HEPES buffer ( $50 \text{ mM}$ ,  $\text{pH } 7.4$ ,  $\text{DTPA } 1\text{mM}$ ) under anaerobic conditions.

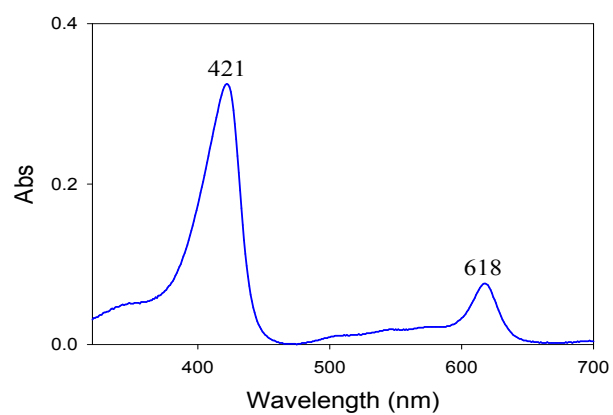

Supplementary references:

- (1) Cheng, R. J.; Latosgrzynski, L.; Balch, A. L., Preparation and Characterization of Some Hydroxy Complexes of Iron(III) Porphyrins *Inorg. Chem.* **1982**, *21* (6), 2412-2418.
- (2) Derbesy, G.; Harpp, D. N.; Rather, B.; Carroll, G., Preparation and characterization of tert-butyl hydrodisulfide *Sulfur Lett.* **1992**, *14* (4), 199-204.
